# Supplementary material for: The regenerative role of mast cells and mesenchymal stem cells in histopathology of sciatic nerve and tibialis cranialis muscle, following denervation in rats
Source: Research Square preprint supplement (doi:10.21203/rs.3.rs-2312324/v1), 2022-12-02
Supplement: Supplementary file 1 [file 8f1c4f5d307be1b8a1332177.docx]

**Table 1:** Comparison of histomorphometric parameters of TCM between the groups in each time and three different times in each group (Mean ± Se).


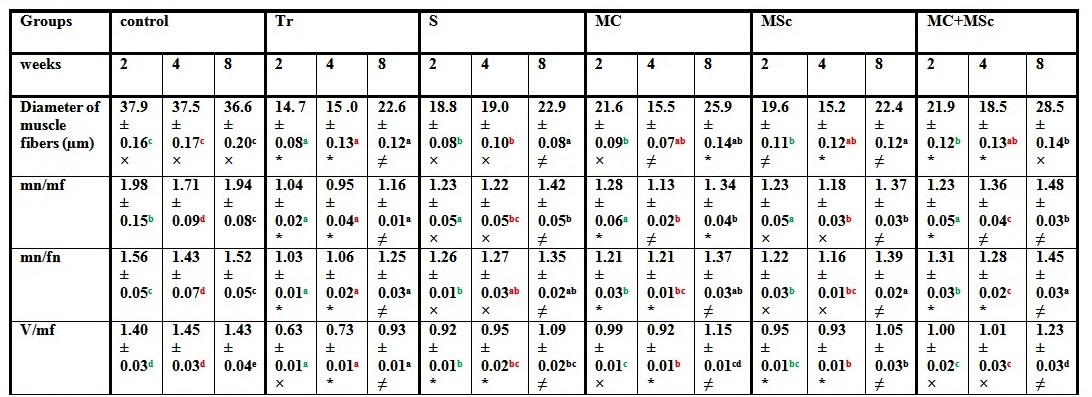


The letters are for comparison between groups in each time, and the symbols (×, *, ≠) are for comparison between three different times in each group. The presence of different letters or symbols indicates significant difference at level of P<0.05.

**Table 2:** Comparison of histopathologic parameters of TCM between the groups in each time and three different times in each group (Mean ± Se).


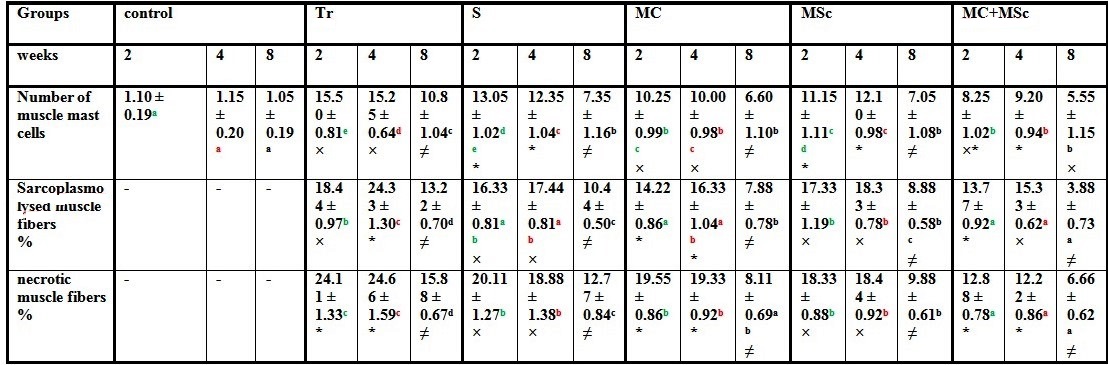


The letters are for comparison between groups in each time, and the symbols (×, *, ≠) are for comparison between three different times in each group. The presence of different letters or symbols indicates significant difference at level of P<0.05.

**Table 3:** Comparison of histomorphometric parameters of the sciatic nerve (proximal sections, transection site) between the groups in each time and three different times for each group (Mean ± Se).


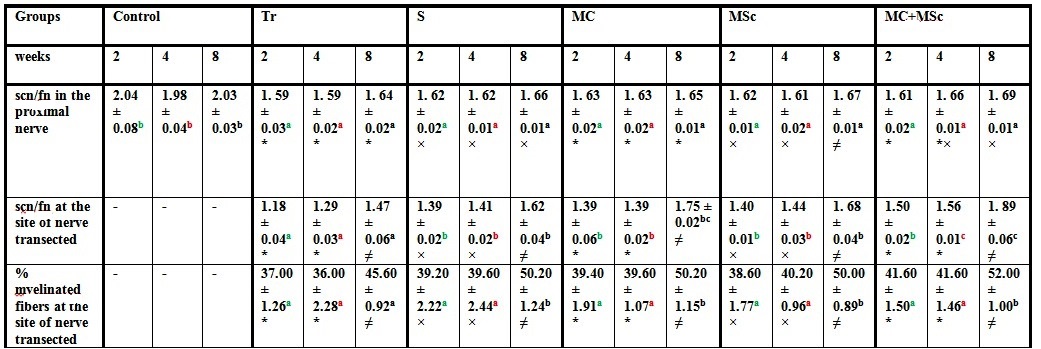


The letters are for comparison between groups in each time, and the symbols (×, *, ≠) are for comparison between three different times in each group. The presence of different letters or symbols indicates significant difference at level of P<0.05.

**Table 4:** Comparison of histomorphometric parameters of the sciatic nerve in distal part of transection site between the groups in each time and three different times in each group (Mean ± Se).


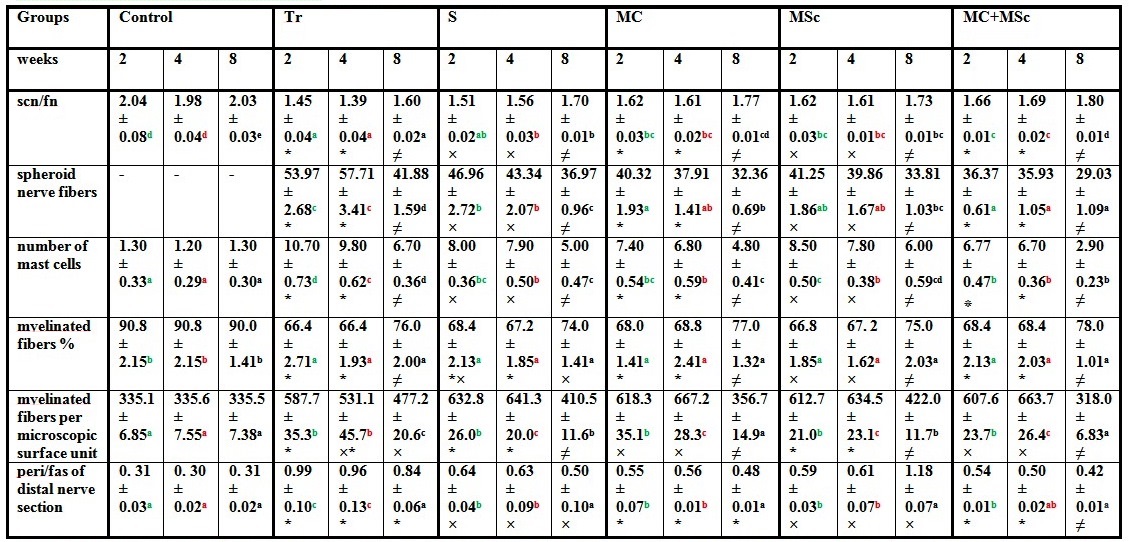


The letters are for comparison between groups in each time, and the symbols (×, *, ≠) are for comparison between three different times in each group. The presence of different letters or symbols indicates significant difference at level of P<0.05.
